# Supplementary material for: Single-cell RNA-seq of esophageal squamous cell carcinoma cell line with fractionated irradiation reveals radioresistant gene expression patterns
Source: PubMed Central journal article supplement (PMC6659267; doi:10.1186/s12864-019-5970-0), 2019-07-25

# Supplementary Figure 1

## A

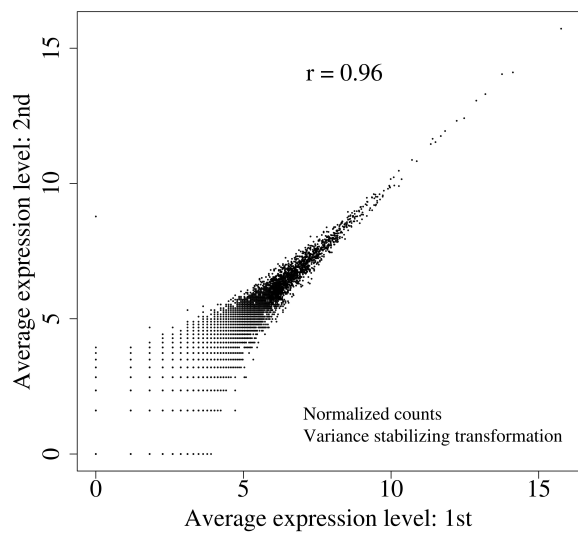

## C

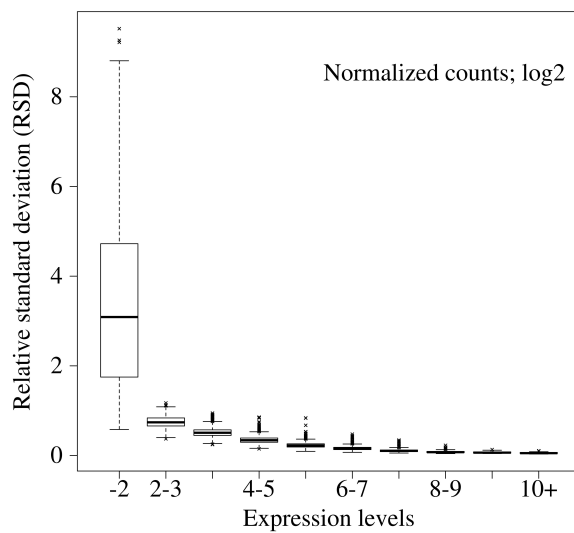

## B

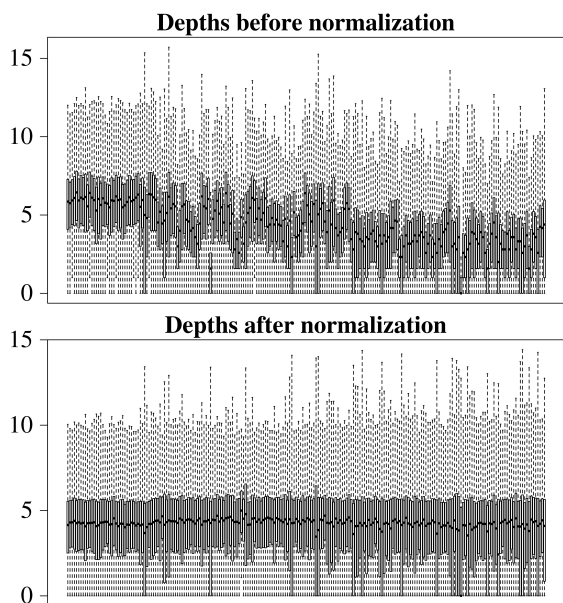

## D

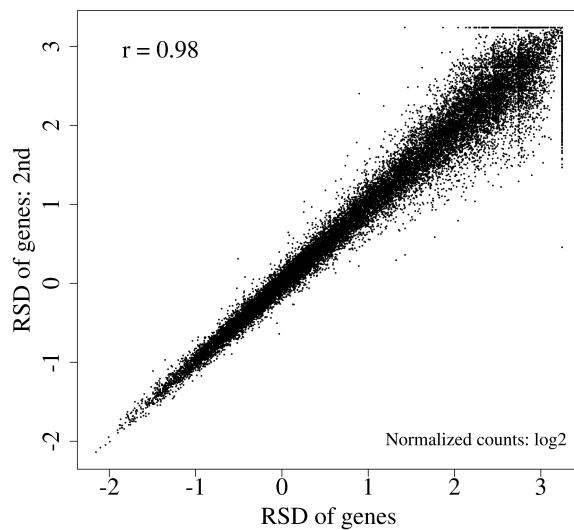

Supplementary Figure 2

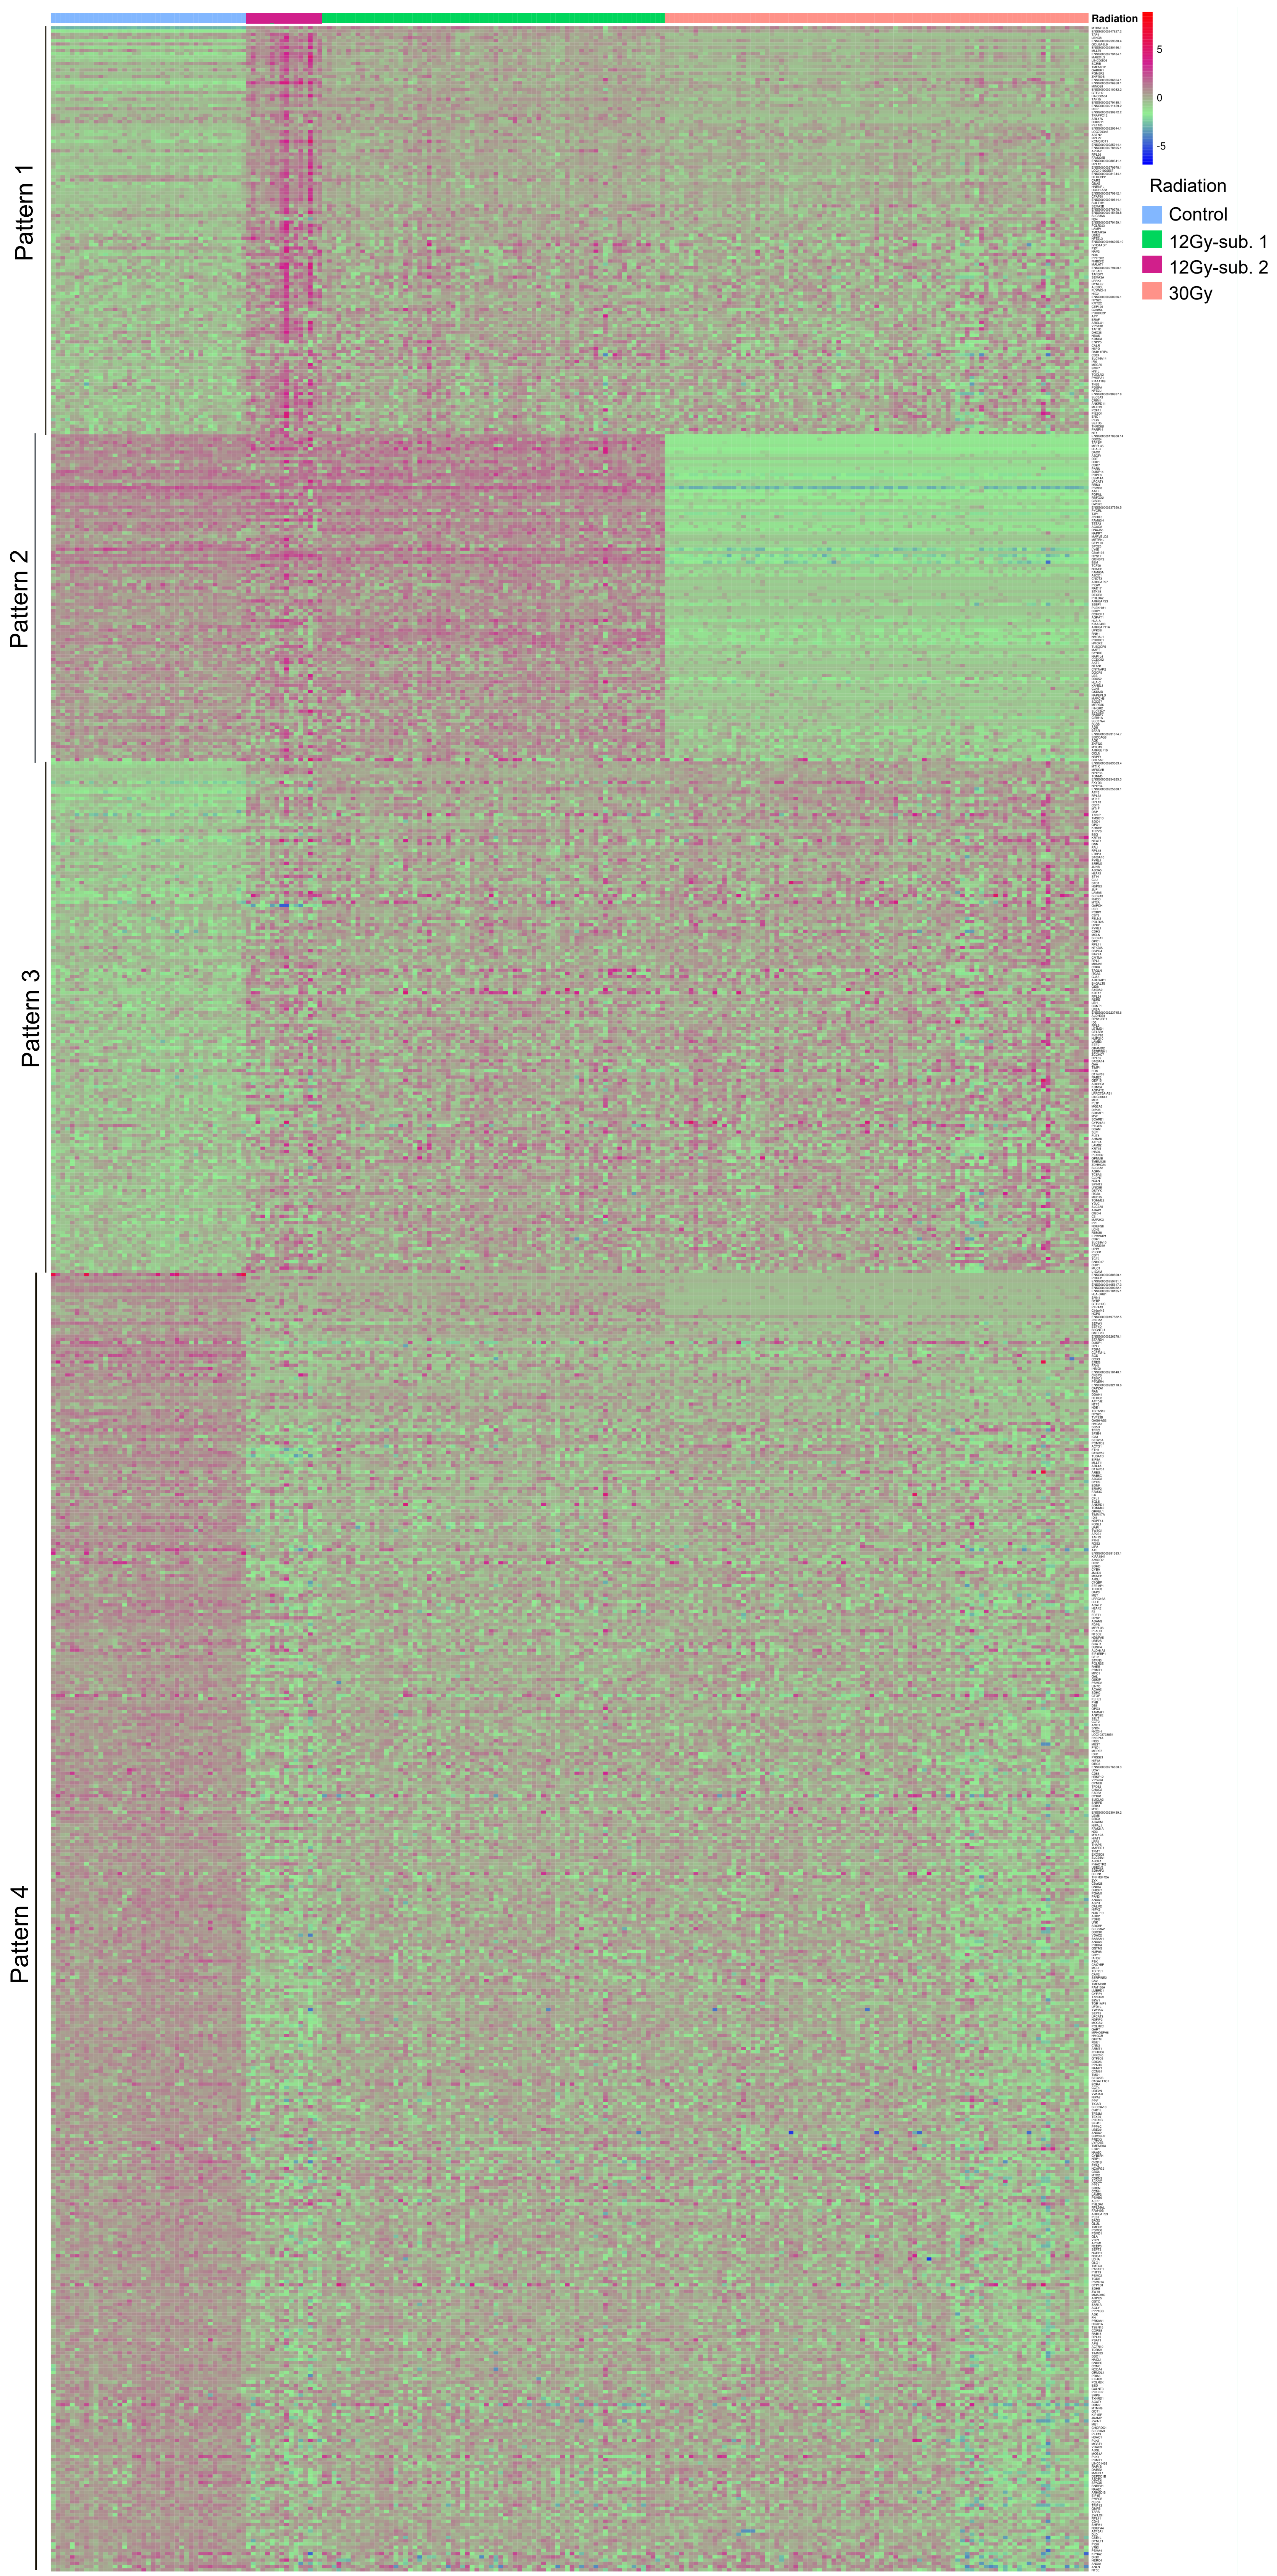

# Supplementary Figure 3

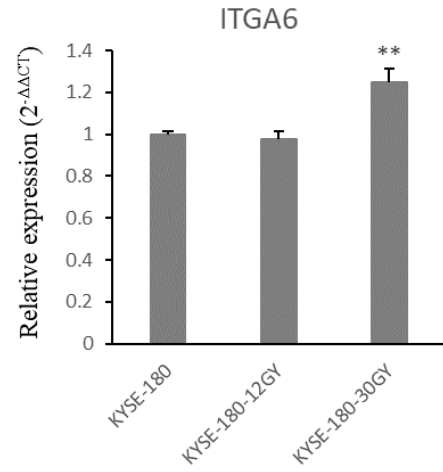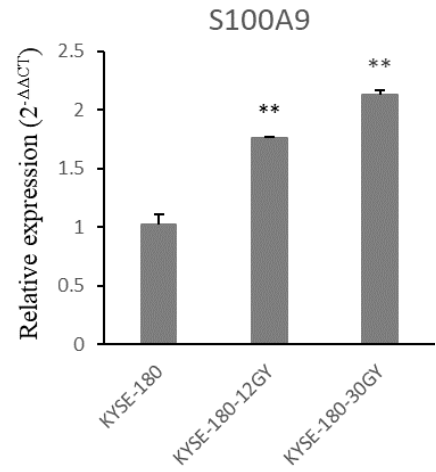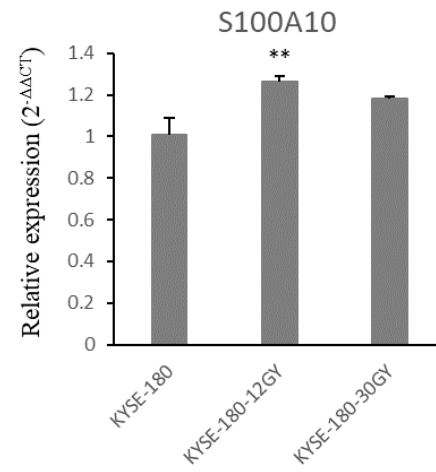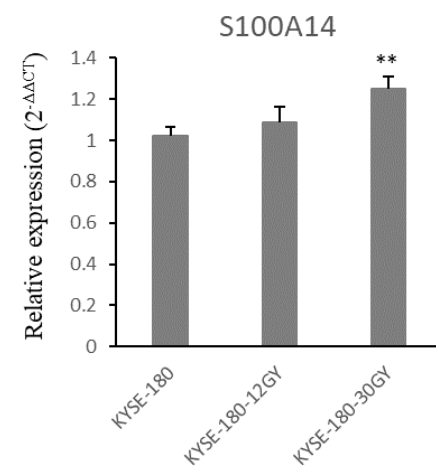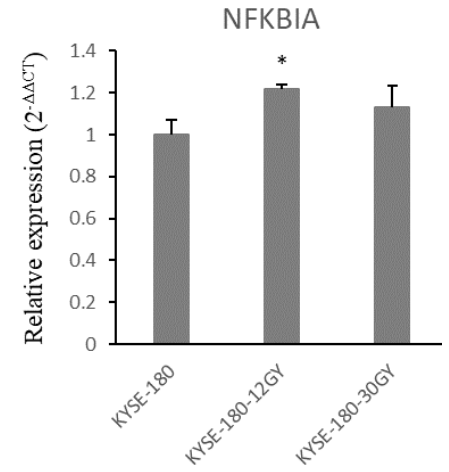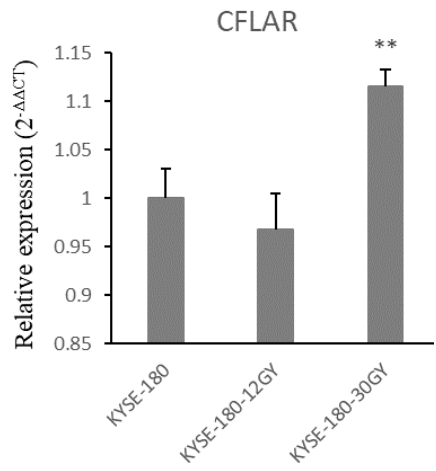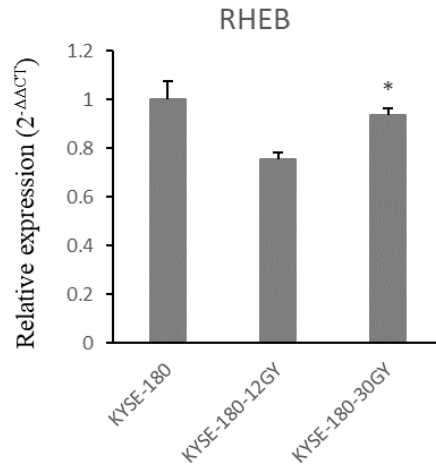

# Supplementary Figure 4

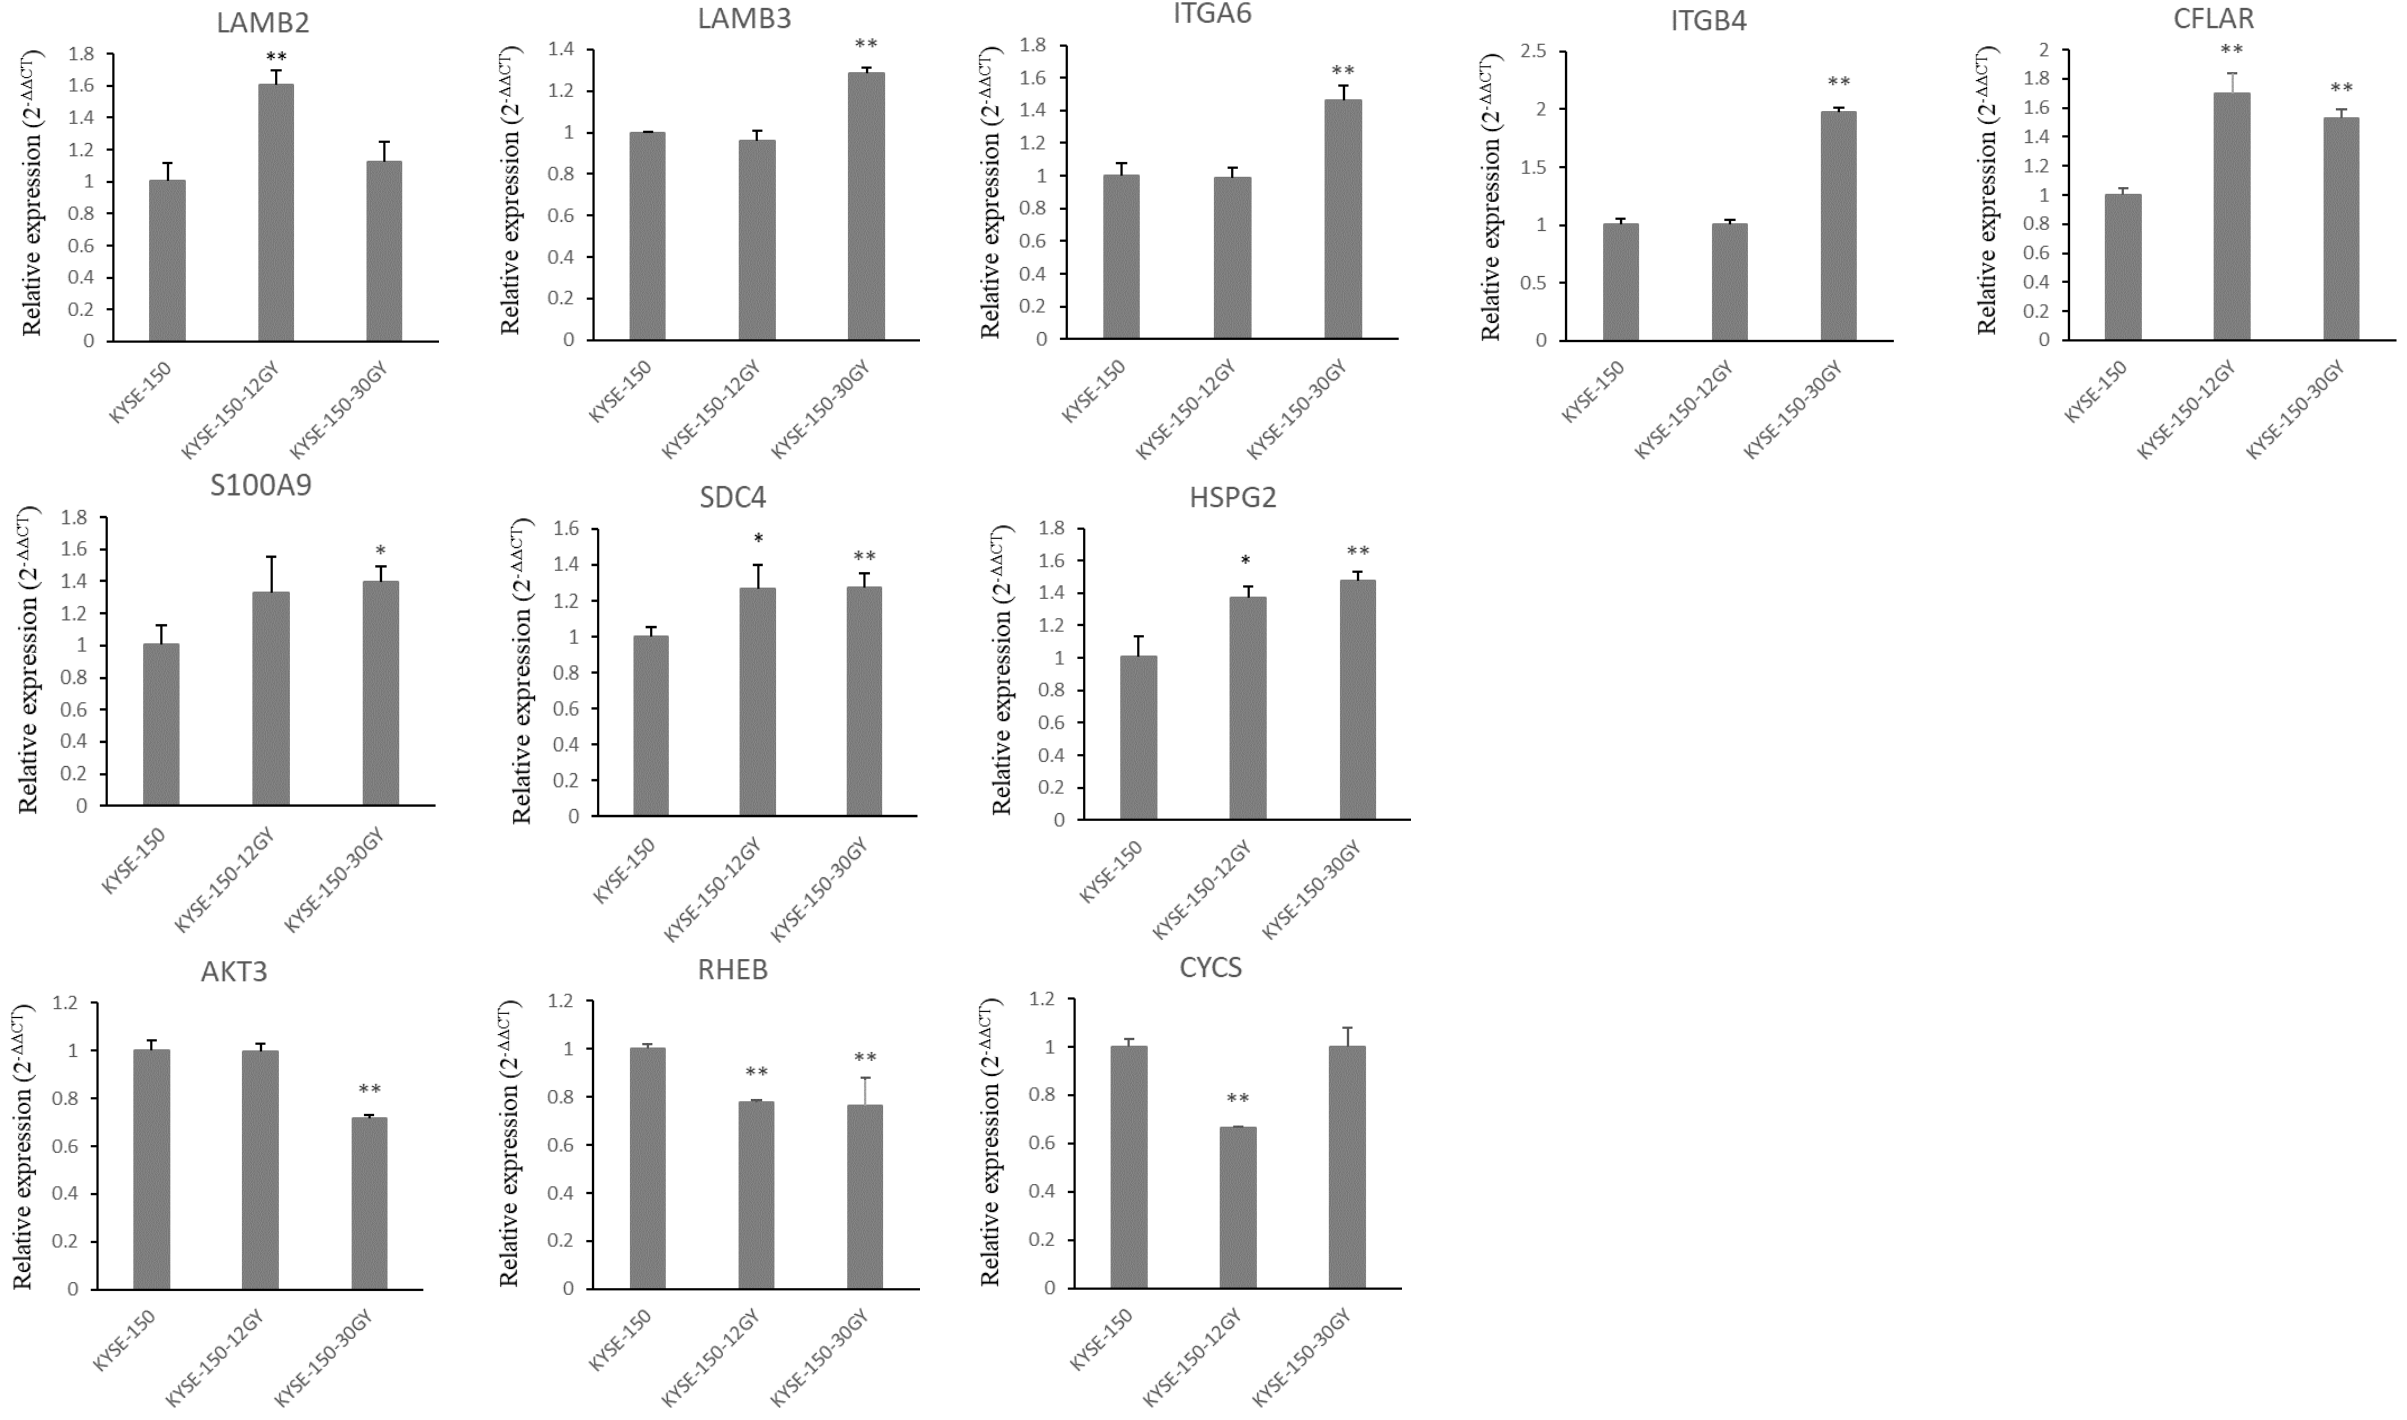



# Supplementary Figure 5

**a**

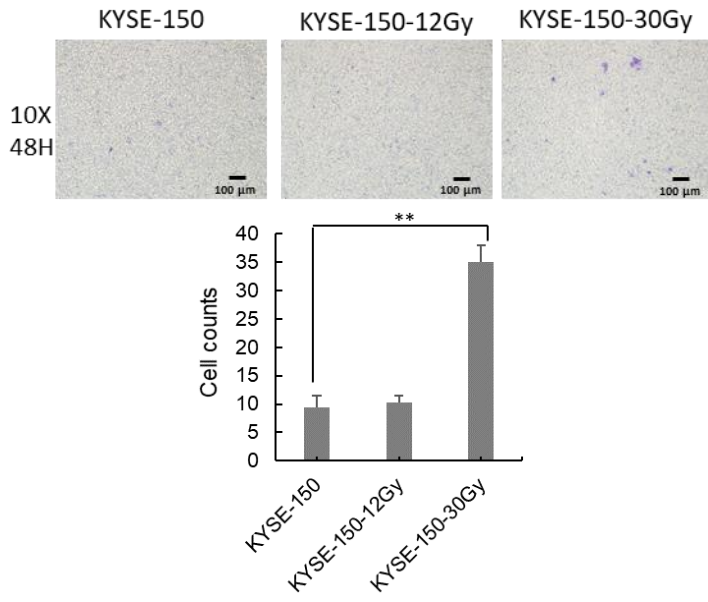

**b**

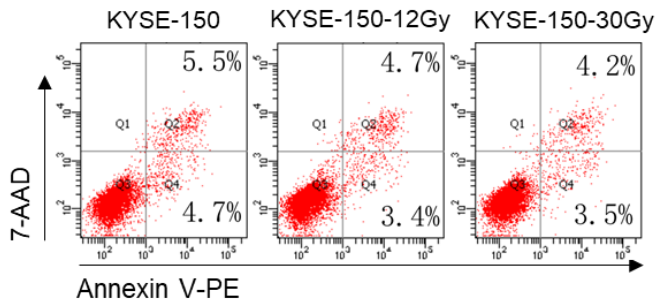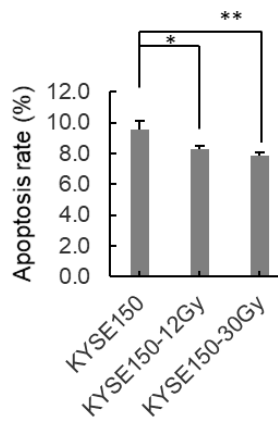

**c**

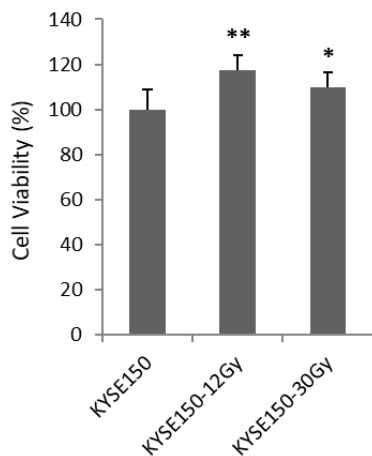

Supplement: 12864_2019_5970_MOESM1_ESM.pdf [file 12864_2019_5970_MOESM1_ESM.pdf]
